# Plasmid stability in fluctuating environments: population genetics of multi-copy plasmids

V Miró Pina<sup>1, 2, †</sup>, JCR Hernandez-Beltran<sup>3, †</sup>, A Siri-Jégousse<sup>4</sup>, S Palau<sup>4</sup>, R Peña-Miller<sup>3</sup> and A González Casanova<sup>5</sup>

<sup>1</sup> Centre for Genomic Regulation (CRG), The Barcelona Institute of Science and Technology, Barcelona, Spain, <sup>2</sup> Universitat Pompeu Fabra (UPF), Barcelona, Spain, <sup>3</sup> Laboratorio de Biología de Sistemas, Centro de Ciencias Genómicas, Universidad Nacional Autónoma de México, 62210, Cuernavaca, México, <sup>4</sup> Departamento de Probabilidad y Estadística, Instituto de Investigación en Matemáticas Aplicadas y en Sistemas, Universidad Nacional Autónoma de México, México, <sup>5, \*</sup> Instituto de Matemáticas, Universidad Nacional Autónoma de México, México

## 1 ABSTRACT

2 Plasmids are extra-chromosomal genetic elements that encode a wide variety of phenotypes and can be maintained  
3 in bacterial populations through vertical and horizontal transmission, thus increasing bacterial adaptation to hostile  
4 environmental conditions like those imposed by antimicrobial substances. To circumvent the segregational instability  
5 resulting from randomly distributing plasmids between daughter cells upon division, non-transmissible plasmids tend  
6 to be carried in multiple copies per cell, with the added benefit of exhibiting increased gene dosage. But carrying  
7 multiple copies also results in a high metabolic burden to the bacterial host, therefore reducing the overall fitness of  
8 the population. This trade-off poses an existential question for plasmids: What is the optimal plasmid copy number?  
9 In this manuscript, we address this question using a combination of population genetics modeling with microbiology  
10 experiments consisting of *Escherichia coli* K12 bearing a multi-copy plasmid encoding for *bla*<sub>TEM-1</sub>, a gene conferring  
11 resistance to  $\beta$ -lactam antibiotics. We postulate and analyze a Wright-Fisher model to evaluate the interaction between  
12 selective pressure, the number of plasmid copies carried by each cell, and the energetic cost associated with plasmid  
13 bearing. By numerically determining the optimal plasmid copy number for constant and fluctuating selection regimes,  
14 we show that the stability of multi-copy plasmids is maximized at intermediate plasmid copy numbers. We conclude  
15 by arguing that plasmid copy number is a highly optimized evolutionary trait that depends on the rate of environmental  
16 fluctuation and balances the benefit between increased stability in the absence of selection with the burden associated  
17 with carrying multiple copies of the plasmid.

18 **KEYWORDS** Multi-copy plasmids, Wright-Fisher model, Experimental microbiology, Optimal plasmid copy number

## Introduction

1 Prokaryotes transfer DNA at high rates within microbial communities through mobile genetic elements  
2 such as bacteriophages (Chen *et al.* 2018), transposons (Chen and Dubnau 2004) or extra-chromosomal  
3 DNA molecules known as plasmids (Funnell and Phillips 2004). Crucially, plasmids have core genes  
4 that allow them to replicate independently of the chromosome but also encode for accessory genes that  
5 provide their bacterial hosts with new functions and increased fitness in novel or stressful environmental  
6 conditions (Groisman and Ochman 1996). Plasmids have been widely studied due to their biotechno-  
7 logical potential (Alonso and Tolmasky 2020) and their relevance in agricultural processes (Pemberton  
8 and Don 1981), but also because of their importance in clinical practice since they have been identified  
9 as significant factors contributing to the current global health crisis generated by drug resistance of  
10 clinically-relevant pathogens (San Millan 2018).  
11

doi: 10.1534/genetics.XXX.XXXXXX

Manuscript compiled: Monday 14<sup>th</sup> March, 2022

<sup>†</sup>These authors contributed equally to this work.

\*Corresponding author: [adriangcs@matem.unam.mx](mailto:adriangcs@matem.unam.mx)

1 It is generally assumed that, in the absence of selection for plasmid-encoded genes, most plasmids  
2 impose a burden for their bacterial hosts (Baltrus 2013; San Millan and Maclean 2017). As a result,  
3 plasmid-bearing populations usually have a competitive disadvantage against plasmid-free cells, thus  
4 threatening plasmids to be cleared from the population through purifying selection (Vogwill and  
5 MacLean 2015). To avoid extinction, some plasmids overcome segregational instability by transmitting  
6 horizontally to lineages with increased fitness, with previous theoretical results establishing sufficient  
7 conditions for plasmid maintenance, namely that the rate of horizontal transmission has to be larger  
8 than the combined effect of segregational loss and fitness cost (Stewart and Levin 1977; Bergstrom *et al.*  
9 2000). Also, some plasmids encode molecular mechanisms that increase their stability, for instance, toxin-  
10 antitoxin systems that kill plasmid-free cells (Mochizuki *et al.* 2006), or active partitioning mechanisms  
11 that ensure the symmetric segregation of plasmids upon division (Salje 2010).

12 To circumvent segregational loss, non-conjugative plasmids lacking active partitioning and post-  
13 segregational killing mechanisms tend to be present in many copies per cell, therefore, decreasing  
14 the probability of producing a plasmid-free cell when randomly segregating plasmids during cell  
15 division. But this reduced rate of segregational loss is not sufficient to explain the stable persistence  
16 of costly plasmids in the population, suggesting that a necessary condition for plasmids to persist in  
17 the population is to carry beneficial genes for their hosts that are positively selected for in the current  
18 environment. However, regimes that positively select for plasmid-encoded genes can be sporadic and  
19 highly specific, so plasmid persistence is not guaranteed in the long term. Moreover, even if a plasmid  
20 carries useful genes for the host, these can be captured by the chromosome, thus making plasmids  
21 redundant and rendering them susceptible to be cleared from the population (Hall *et al.* 2016).

22 While the benefits of carrying plasmids may be clear under certain circumstances, it is also patent  
23 that their maintenance can be associated with a considerable energetic cost. For instance, increasing  
24 plasmid copy number results in an increase in gene dosage and a reduced probability of plasmid loss,  
25 but can also be associated with a larger fitness cost in the absence of selection for plasmid-encoded genes.  
26 This trade-off between segregational stability and fitness cost has been shown to drive ecological and  
27 evolutionary dynamics in plasmid-bearing populations (Paulsson and Ehrenberg 1998), resulting from  
28 multi-level selection acting on extrachromosomal genetic elements (Paulsson 2002; Garoña *et al.* 2021). As  
29 a result, a series of theoretical and experimental studies have proposed that non-transmissible plasmids  
30 must provide additional benefits for plasmid-bearing populations, with important consequences in the  
31 ecological and evolutionary dynamics of bacterial populations (Rodríguez-Beltrán *et al.* 2021).

32 Of note, as multi-copy plasmids are present in numerous copies per cell, the mutational target  
33 increases considerably and, once a beneficial mutation appears, its expression is amplified during  
34 plasmid replication. This results in an accelerated rate of adaptation to adverse environmental conditions  
35 (San Millan 2018) and enables evolutionary rescue (Santer and Uecker 2020). Also, multi-copy plasmids  
36 increase the genetic diversity of the population, thus enhancing survival in fluctuating environments  
37 and allowing bacterial populations to circumvent evolutionary trade-offs (Rodríguez-Beltrán *et al.* 2018).  
38 Furthermore, random segregation and replication of plasmids produce a complex interaction between  
39 plasmid copy number, genetic dominance, and segregational drift, with important consequences in the

fixation probability of beneficial mutations (Ilhan *et al.* 2019) and the repertoire of genes that can be carried in mobile genetic elements (Rodriguez-Beltran *et al.* 2019).

In this paper, we use a classic Wright-Fisher modeling approach to evaluate the interaction between the number of plasmid copies contained in each cell and the energetic cost associated with carrying each plasmid copy. We will assume that this is a non-transmissible, multi-copy plasmid (it can only be transmitted vertically), and that it lacks active partitioning or post-segregational killing mechanisms (plasmids segregate randomly upon division). We will also consider that plasmids encode for a gene that increases the probability of survival to an otherwise lethal concentration of an antimicrobial substance. We use computer simulations to evaluate plasmid stability as a function of the duration and strength of selection in favor of this plasmid-encoded resistance gene. This will allow us to estimate the plasmid copy number that maximizes plasmid stability under different environmental regimes: drug-free environments, constant exposure to a lethal drug concentration, and intermittent periods of selection.

To validate the results obtained experimentally, we will use an experimental model system consisting on *Escherichia coli* carrying a multi-copy plasmid pBGT (~19 copies per cell) encoding *bla*<sub>TEM-1</sub>, a drug-resistance gene that produces a  $\beta$ -lactamase that degrades ampicillin and other  $\beta$ -lactam antibiotics (Salverda *et al.* 2010; San Millan 2018). pBGT also encodes for a GFP fluorescent marker, and therefore we can obtain time-resolved estimates on the fraction of plasmid-bearing cells present in the population using a spectrophotometer. Specifically, here we will perform competition experiments under a range of drug concentrations (a  $\beta$ -lactam antibiotic, ampicillin) with different initial fractions of plasmid-bearing and plasmid-free cells, thus providing estimates on key parameters of our population genetics model.

Both our model and the experimental results confirm the existence of two opposing evolutionary forces acting on the number of copies carried by each cell: selection against high-copy plasmids consequence of the fitness cost associated with bearing multiple copies of a costly plasmid, and purifying selection resulting from the increased probability of plasmid loss observed in low-copy plasmids. We conclude by arguing that, as the existence of plasmids in natural environments requires intermittent periods of positive selection, the presence of plasmids contains information on the environment on which a population has evolved. Indeed, the plasmid copy number associates the frequency of selection with the energetic costs of plasmid maintenance. That is, there is a minimum frequency of drug exposure that allows multiple copies to persist in the population, and, for each environmental regime, there is an optimal number of plasmid copies.

## 1 The Model

### 2 **A Wright-Fisher model for multi-copy plasmid dynamics**

3 We consider a discrete-time Wright-Fisher process to model the evolution of a population of fixed size  
4  $N$ , with two types of individuals: plasmid-bearing (PB) and plasmid-free (PF). Let us denote by  $n$  the  
5 plasmid copy number (PCN) and argue that this is an important parameter: in the one hand, the selective  
6 disadvantage of PB individuals due to the cost of carrying plasmids is assumed to be proportional to  $n$ ;  
7 on the other hand, the PCN determines the heritability of the plasmid.

8 At the moment of cell division, each plasmid is randomly segregated into one of the two new cells,  
9 and, once in the new host, the plasmids replicate until reaching  $n$  copies. If, however, one of the two  
10 new cells has all the  $n$  copies, the other one will not carry any plasmid copies and therefore becomes  
11 PF. This means that the daughter of a PB cell becomes PF with probability  $\mu_n = 2^{-n}$  (segregational loss  
12 rate). As a consequence, plasmids are readily cleared from the population when the number of copies is  
13 low, and the rate of plasmid loss decreases exponentially with  $n$ . Segregational loss can be seen, in a  
14 Wright-Fisher model as “mutations” from PB to PF at rate  $\mu_n$ .

We also consider that the fitness cost associated with plasmid maintenance is a constant multiplied  
by  $n$ . In the Wright-Fisher model, this would correspond to PB individuals having some selective  
disadvantage  $\kappa_n$ . Formally, if  $X_i^{(N)}$  is the proportion of PB individuals at generation  $i$ , each individual at  
generation  $i + 1$  chooses a PB parent with probability

$$\frac{(1 - \kappa_n)X_i^{(N)}}{(1 - \kappa_n)X_i^{(N)} + 1 - X_i^{(N)}}.$$

Since the cost of plasmid is very large compared to  $1/N$  (i.e.  $\kappa_n = \kappa n$ ), we are in the case of strong  
selection (see Baake *et al.* (2018) and Appendix A). The frequency process of PB individuals converges,  
when  $N \rightarrow \infty$ , to a discrete time deterministic sequence defined in a recursive way as

$$X_{i+1} = f(X_i) := \frac{(1 - \kappa_n)X_i}{(1 - \kappa_n)X_i + 1 - X_i}(1 - \mu_n), \quad i \geq 1. \quad (1)$$

### 15 **Modeling the introduction of antibiotics**

16 Additionally, we aim at modelling selection for plasmid-encoded genes. For plasmids that encode  
17 antibiotic resistance genes, this is achieved by treating the population with antibiotic pulses. Individuals  
18 with no plasmids are more exposed to this treatment and at each pulse we observe an increment of the  
19 relative frequency of the plasmid-bearing population. To model this phenomenon, we assume that, in  
20 the presence of antibiotic, PF individuals have some selective disadvantage  $\alpha \in [0, 1]$ .

If the antibiotic pulse occurs at generation  $i$ , the fraction of PB individuals before reproduction  
becomes

$$g(X_i) := \frac{X_i}{X_i + (1 - \alpha)(1 - X_i)}.$$

Then, after reproduction, the frequency of PB individuals at the next generation is  $X_{i+1} = f(g(X_i))$ . Finally, considering that the pulses occur at generations  $T, 2T, \dots$ , the frequency process becomes

$$X_{i+1} = \begin{cases} f(g(X_i)) = \frac{(1-\kappa_n)X_i}{1-\alpha+(\alpha-\kappa_n)X_i}(1-\mu_n) & \text{if } i = jT, j = 1, 2, \dots \\ f(X_i) = \frac{(1-\kappa_n)X_i}{(1-\kappa_n)X_i+1-X_i}(1-\mu_n) & \text{otherwise.} \end{cases} \quad (2)$$

### **Serial dilution protocol**

The assumption of constant population size seems far from reasonable, specially in a serial dilution protocol. There had been several attempts to adapt the classical theory of Wright Fisher models to this experimental setting (see for example Chevin (2011)). A mathematical rigorous way to do this was developed in González Casanova *et al.* (2016). In Gerrish and Lenski (1998) an heuristic and applicable to data framework was introduced. Recently, in Baake *et al.* (2019), the two methodologies had been paired in order to have a rigorous and applicable way to use classic population genetics to study experiments. In this work, days take the role of generations, and as the number of individuals after each sampling is more or less constant, the assumption of constant population size becomes reasonable.

Each day starts with a population of  $N$  cells that grow exponentially until saturation is reached (i.e. until there are  $\gamma N$  cells.). The reproduction rate (or *Malthusian fitness*) of PB (resp. PF) individuals is  $r$  (resp.  $r + \rho$ ), with  $\rho > 0$  (since PB individuals have some disadvantage due to the cost of plasmid maintenance). The duration of the growth phase is  $\sigma \simeq \log(\gamma)/r$ .

This fluctuations in the population size modify the effective "mutation" and "selection" parameters  $\kappa_n$  and  $\mu_n$ , which need to be suitable calculated taking by analytic tools that into account the intra-day dynamics of the population. In Appendix A we detail how this correspondence is made.

In our case, the population behaves as in (2), where each generation is one day and

$$\kappa_n = \frac{\rho(1 - e^{-(r2^{-n} + \rho)\sigma})}{r2^{-n} + \rho} \quad \text{and} \quad \mu_n = 1 - \frac{r2^{-n} + \rho}{r2^{-n}e^{(r2^{-n} + \rho)\sigma} + \rho}. \quad (3)$$

The importance of this formulas is that they breach measurable quantities with theoretical parameters, leading to a method to estimate the parameters of the model from experiments, which is spirit of the experiment that we designed and performed.

## 1 Results

### 2 *Segregational instability in the absence of selection*

3 First, we focused on segregational instability in the absence of selection for plasmid-encoded genes (i.e.  
4 without antibiotics). By numerically solving equation (1), we studied the stability of plasmids in terms  
5 of the mean plasmid copy number (PCN) and the fitness cost associated with carrying each plasmid  
6 copy ( $\kappa$ ). As expected, in the absence of selection, plasmids are always cleared from the population with  
7 a decay rate that depends on PCN. We define the time-to-extinction as the time when the fraction of  
8 plasmid-bearing (PB) cells goes below an arbitrary threshold.

9 For cost-free plasmids (i.e. when  $\kappa = 0$ ), the time-to-extinction appears to be correlated to PCN as  
10 illustrated in Figure 1A. In contrast, if we consider costly plasmids ( $\kappa > 0$ ) and that the total fitness  
11 cost is proportional to the PCN (i.e. if  $PCN = n$ , the total cost is  $\kappa_n = \kappa n$ ), then extinction occurs in  
12 a much faster timescale (Figure 1B – notice the difference of timescales with Figure 1A). As shown in  
13 Figure 1B, small PCN values are associated with a high probability of segregational loss, and therefore  
14 the time-to-extinction increases with PCN. However, large values of PCN are associated with higher  
15 levels of instability due to the detrimental effect on host fitness resulting from carrying multiple copies  
16 of a costly plasmid.

17 This observation indicates the existence of a non-linear relationship between stability of plasmids and  
18 the mean PCN of the population. To further explore this relationship, we estimated computationally the  
19 time-to-extinction in a long-term setting (simulations running up to 500 days) for different values of  
20 PCN and fitness cost. Figure 1C shows an accelerated rate of plasmid loss in costly plasmids. Crucially,  
21 there appears to be a critical PCN that maximizes the time-to-extinction, that depends on the per-cell  
22 plasmid cost. The time-to-extinction gives a notion of the stability of plasmids, but this measure may not  
23 apply if we introduce antibiotics, and therefore avoid plasmid extinction. For this reason we quantified  
24 plasmid stability by measuring area under the curve (AUC) of simulation trajectories similar to those in  
25 Figure 1B. Figure 1D illustrates the existence of a region in the cost-PCN plane, at intermediary PCN  
26 values, where plasmid stability is maximized.



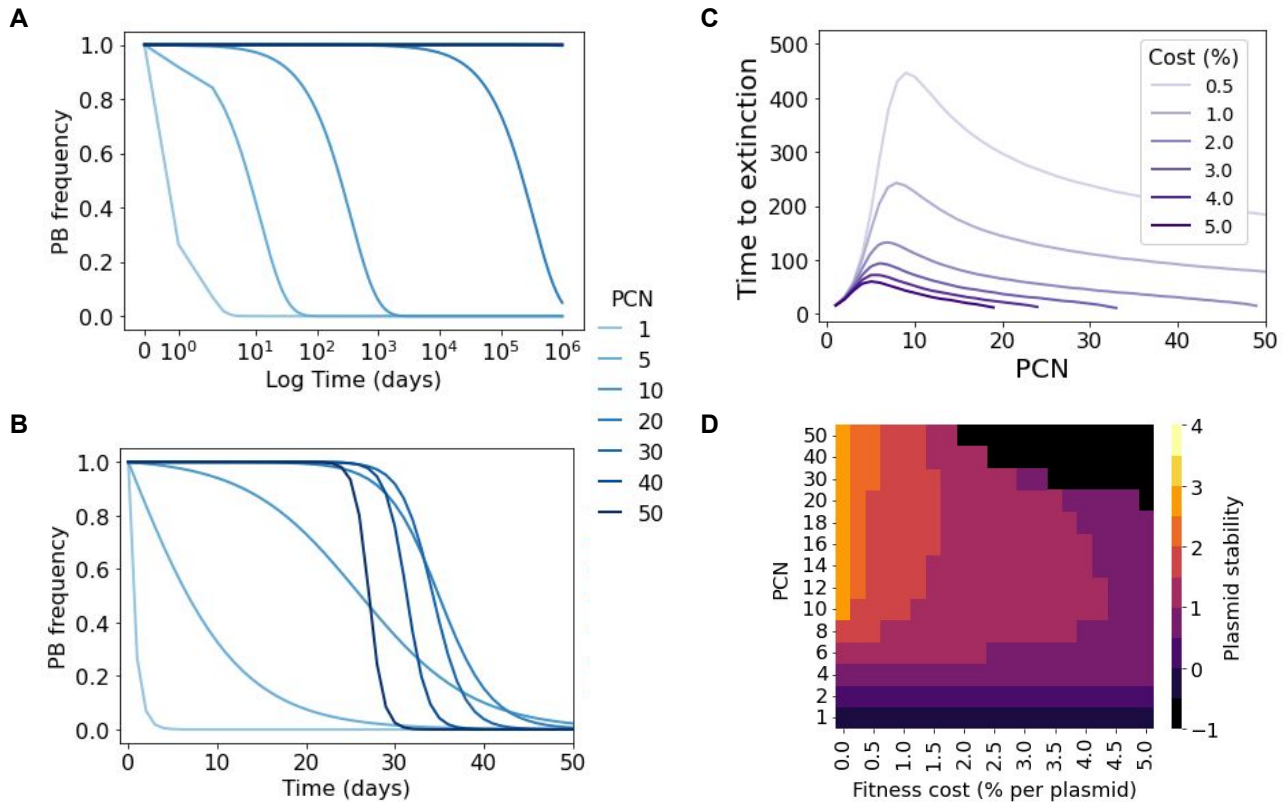

**Figure 1** Numerical results for the model without selection for plasmid-encoded genes. **A)** Plasmid frequency as a function of time for a cost-free plasmid ( $\kappa = 0$ ). Note how, as the PCN increases, the stability of plasmids also increases, although eventually all plasmids will be cleared from the system. **B)** Dynamics of plasmid loss for strains bearing a costly plasmid ( $\kappa = 0.0143$ ). In this case, low-copy plasmids (light blue lines) are highly unstable, but so are high-copy plasmids (dark blue lines). **C)** Time elapsed before plasmid extinction for a range of PCNs. A very costly plasmid ( $\kappa = 5\%$ ) is represented in dark purple, while the light purple line denotes a less costly plasmid ( $\kappa = 0.5\%$ ). **D)** Plasmid stability for a range of fitness costs and plasmid copy numbers (discrete colormap indicates level of stability, yellow denotes higher stability, while dark purple denotes rapid extinction). Stability is measured as the area under the curve (AUC) of trajectories similar to those in **B**, expressed in  $\log_{10}$  scale. Notice that, for intermediate fitness costs, the PCN that maximizes plasmid stability can be found at intermediate values.

## 1 **Evaluating the role of selection in the stability of plasmids**

2 To study the interaction between plasmid stability and the strength of selection in favor of PB cells our  
 3 model considers that the plasmid carries a gene that confers a selective advantage to the host in certain  
 4 environments (e.g. resistance to heavy metals or antibiotics). For the purpose of this study, we will  
 5 consider a bactericidal antibiotic that kills PF cells with a probability that depends on the antibiotic dose,  
 6 resulting in a competitive advantage of the PB cells with respect to PF ones in this environment. We  
 7 denote the intensity of this selective pressure by  $\alpha$ .

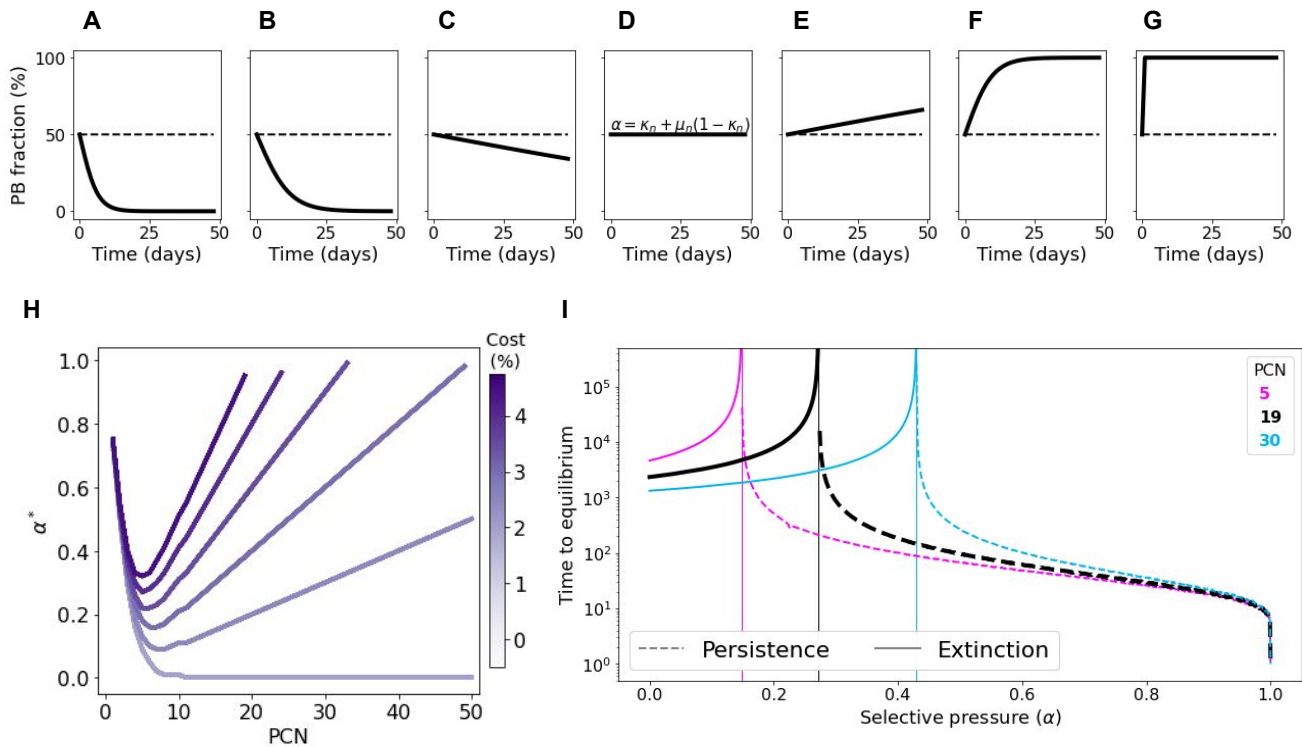

**Figure 2** Numerical results illustrating the effect of a constant selective pressure in the stability of non-transmissible multi-copy plasmids. **A-G)** Each box illustrates the temporal dynamics of the plasmid-bearing subpopulation in a pair-wise competition experiment inoculated with equal initial fractions of PF and PB. From left to right,  $\alpha = 0, 0.2, 0.26, 0.28, 0.6$  and  $1$ . The dotted line denotes  $\alpha^* = \kappa_n + \mu_n(1 - \kappa_n)$  for  $n = 19$  and  $\kappa_n = 0.27$ . Note that for values of  $\alpha < \alpha^*$ , plasmids are unstable and eventually cleared from the population, while for  $\alpha > \alpha^*$  the plasmid-bearing subpopulation increases in frequency until reaching fixation. For  $\alpha = \alpha^*$ , the selective pressure in favor of the plasmid compensates its fitness cost and therefore the plasmid fraction remains constant throughout the experiment. **H)** Minimum selective pressure required to avoid plasmid loss for a range of plasmid copy numbers. Different curves represent plasmids with different fitness costs (light purple denotes cost-free plasmids and dark purple a very costly plasmid). Note that, for costly plasmids, there exists a non-monotone relationship between  $\alpha^*$  and PCN. **I)** Time elapsed before plasmid fraction in the population is stabilized, for a range of copy numbers (5 in magenta, 19 in black, and 30 in cyan). Dotted lines represent plasmid fixation, while dashed lines denote stable co-existence between plasmid-free and plasmid-bearing subpopulations, and solid lines plasmid extinction. The vertical line indicates  $\alpha^*$ , the minimum selective pressure that stably maintains plasmids in the population. Black letters indicate the parameter values used in the examples shown in A-G.

8 **Figures 2A-G** illustrate plasmid dynamics over time for different values of  $\alpha$ , obtained by numerically  
 9 solving equation (2) with a fixed PCN ( $n = 19$ ) and drug always present in the environment ( $T = 1$ ). In  
 10 our model, the critical dose that stabilizes plasmids in the population corresponds to  $\alpha^* = \kappa_n + \mu_n(1 - \kappa_n)$



(see Appendix A). The existence of a minimum antibiotic dose that maintains plasmids in the population is a feature used routinely by bioengineers to stabilize plasmid vectors through selective media (Kumar *et al.* 1991). As illustrated in Figure 2H, both low-copy and high-copy plasmids are inherently unstable and therefore the selective pressure necessary to stabilize them is relatively high, particularly for costly plasmids. Interestingly, at intermediate PCN values, the selective conditions necessary to stabilize plasmids are considerably less stringent than for low- and high-copy plasmids. This is the result of the non-linear relationship between  $\alpha^*$  and  $n$ ; since  $\mu_n$  decreases exponentially with  $n$ , while  $\kappa_n$  increases only linearly with  $n$ .

Figure 2I shows the time elapsed before converging to the steady-state (either extinction or persistence) for different values of  $\alpha$  and PCN. As  $\alpha$  increases, the cost of plasmid-bearing is compensated by the benefit of carrying the plasmid and therefore plasmids are maintained in the population for longer. Note that at large values of  $\alpha$ , plasmid-free cells are killed immediately independently of the mean PCN of the population, resulting very fast in a population composed almost exclusively of plasmid-bearing cells. The equilibrium fraction  $x^* = 1 - \mu_n \frac{1 - \kappa_n}{\alpha - \kappa_n}$  is achieved independently of the initial fraction of PB cells (see Appendix A), which is consistent with previous results (Yurtsev *et al.* 2013).

### **Experimental model system: a non-transmissible, multi-copy plasmid encoding for a resistance gene**

Our model allows to make predictions on how the long-term evolution of plasmid-bearing populations depends on plasmid cost and fitness advantage conferred by the plasmid in certain environments. We aim at quantifying these parameters experimentally. However, a long-term evolutionary experiment would produce changes such as compensatory mutations (Harrison *et al.* 2015; San Millan *et al.* 2014a) or plasmid genes integrating into the chromosome (Hall *et al.* 2016). To overcome this limitation, we designed a simple one-day competition experiment whereby we artificially mixed PB and PF subpopulations at different initial fractions, and exposed them to a gradient of antibiotics.

In particular, here we used *Escherichia coli* MG1655 carrying pBGT, a non-transmissible multi-copy plasmid used previously to study plasmid dynamics and drug resistance evolution (San Millan *et al.* 2016; Rodriguez-Beltran *et al.* 2018; Hernandez-Beltran *et al.* 2020). Briefly, pBGT is a ColE1-like plasmid with  $\sim 19$  plasmid copies per cell, lacking the necessary machinery to perform conjugation or to ensure symmetric segregation of plasmids upon division. This plasmid carries a GFP reporter under an arabinose inducible promoter and the *bla*<sub>TEM-1</sub> gene that encodes for a  $\beta$ -lactamase that efficiently degrades  $\beta$ -lactam antibiotics, particularly ampicillin (AMP). The minimum inhibitory concentration (MIC) of PB cells to AMP is 8,192 mg/l, while the PF strain has a MIC of 4 mg/l (see Appendix B).

To quantify the fitness cost associated with carrying multiple copies of pBGT, we performed growth experiments in 96-well plates where each strain was grown in lysogeny broth (LB) rich media. We obtained approximate values for the maximal growth rates of the PB and PF strains corresponding to  $r$  and  $\rho$  in the intraday model (see (Hall *et al.* 2014) and Appendix B). So, if a reduction in bacterial fitness is expressed in terms of a decrease in its maximum growth rate, then the metabolic burden associated with carrying the pBGT plasmid is  $0.108 \pm 0.067$ .

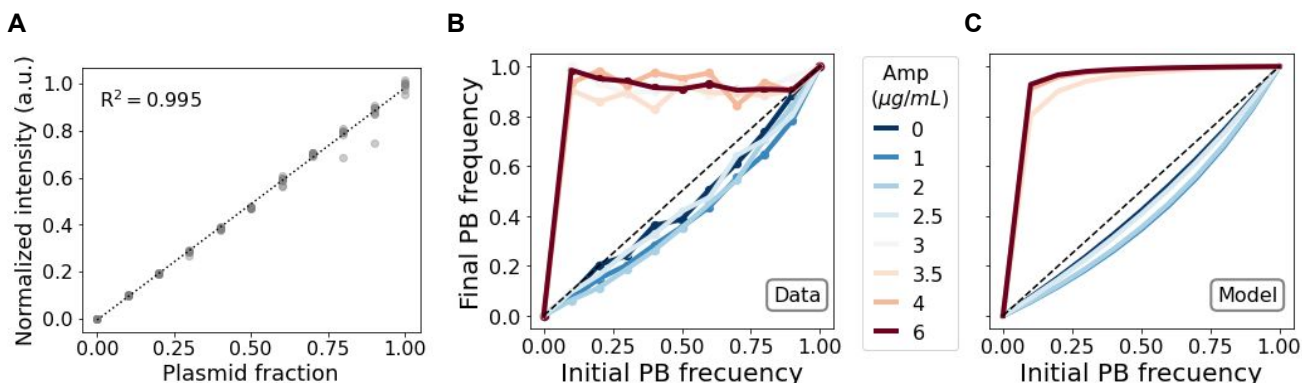

**Figure 3 Model parametrization.** **A)** Plasmid fraction estimation. Different fractions of artificially mixed populations of PB and PF strains vs the normalized fluorescence intensity of such populations. Each dot present a replica and the dotted line is a linear regression with  $R^2=0.995$ . **B)** Competition experiments of the same populations submitted to a range of ampicillin concentrations (0, 1, 2, 2.5, 3, 3.5, 4, and 6  $\mu\text{g/ml}$ ) indicated by different colors. **C)** Simulations using equation (2). Parameters  $\kappa_n$  and  $\alpha$  were estimated using a curve fitting algorithm. Plasmid cost,  $\kappa_n$ , was calculated from the experimental curve without antibiotics. Fixing  $\kappa_n$  we fitted the values of  $\alpha$  for different antibiotic concentrations (see Table 2). Colors indicate antibiotic concentrations. Blues represent concentrations where effect of plasmid cost is stronger than the effect of selection, yielding curves below the identity line. Reds represent concentrations where selection kills PF strain, yielding curve above the identity line.

1 Moreover, we measured the plasmid cost and the decrease in competitive fitness associated to  
 2 antibiotics in our interday model. To do so, we used the normalized fluorescent intensity as a proxy  
 3 for the proportion of PB cells (Figure 3A shows a linear relationship between both quantities) and  
 4 then performed growth experiments starting with different initial fractions of PB cells, with end points  
 5 shown in Figure 3B. In the absence of antibiotic, since the PCN is fixed, the PB fraction at the end of the  
 6 day only depends on the plasmid cost. By fitting equation (1), we obtained  $\kappa_n = 0.272$ . Moreover, by  
 7 fixing this parameter and incorporating antibiotics, we estimate the selective pressure  $\alpha$  for different  
 8 antibiotic concentrations by fitting equation (2) (Figures 3B and 3C). Table 1 summarizes parameter  
 9 values estimated for each strain in our model and Table 2 shows the correspondence between antibiotic  
 10 concentrations and  $\alpha$ .

11 In our experiments, we also observed that low antibiotic concentrations (small values of  $\alpha$ ) yield a  
 12 decrease in the PB frequency, while higher concentrations yield an increase in the PB frequency. This  
 13 is consistent with the existence of a critical antibiotic dose to promote plasmid persistence in constant  
 14 environments observed in Figure 2.

### 15 **Plasmid stability in periodic environments**

16 The aim of this section is to understand the evolutionary dynamics of the plasmid-bearing population in  
 17 fluctuating environments, i.e. when periodic antibiotic pulses are administered. We started by exploring  
 18 how much time a PB population can survive without antibiotics before being rescued by a strong  
 19 antibiotic pulse (Figure 4A). Consistently with the results from the first section, lower plasmid costs  
 20 showed increased rescue times. This introduced the notion that a certain rate of antibiotic pulses would  
 21 be required for plasmid maintenance. In Figure 4B, we quantified this minimal period as a function

of PCN and  $\alpha$ . Note that higher values of  $\alpha$  correspond to longer periods, which follows from the fact that a higher selective pressure increases the PB frequency. Figure 4D illustrate this minimal period for  $PCN = 19$ .

In periodic environments, the PB population will either go extinct or reach a steady state in which the plasmid fraction oscillates around an equilibrium frequency (persistence). In Figure 4C, times to stabilization were estimated for the strong selection regime ( $\alpha = 0.99$ ) using the same PCNs as in Figure 2. Notice that the time-to-extinction is shorter than the time to reach the periodic attractor.

For both the maximal time for rescue and the minimal period to avoid loss, we observe a range of plasmid copy numbers where plasmid stability is maximized. This is consistent with what we observed without antibiotics (Figure 1C) and with constant environments (Figure 2). In the next section, we will explore the concept of optimal PCN.

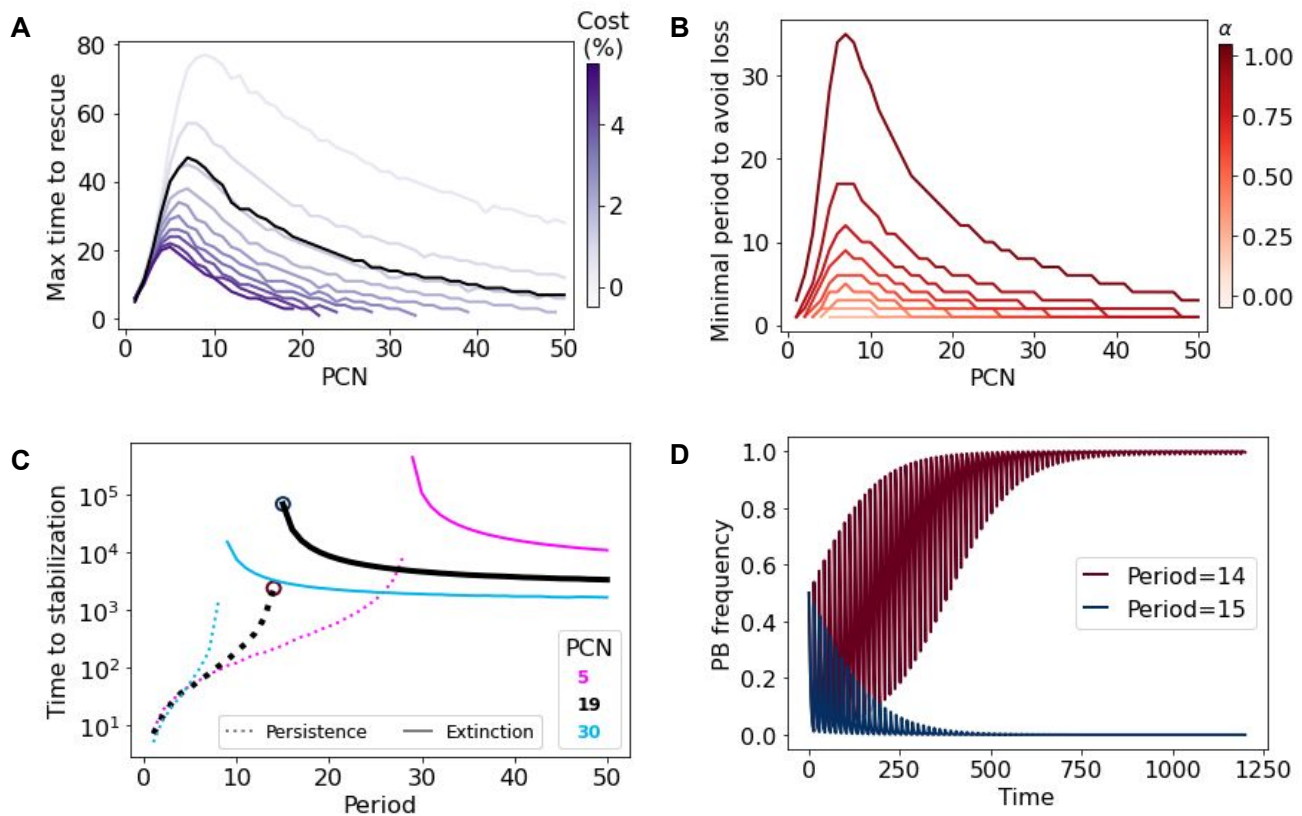

**Figure 4 Numerical results of the model in periodic environments.** A) Maximum time a plasmid population can grow without antibiotics to avoid plasmid loss when applying a strong antibiotic pulse. Curves represent how this time is affected by PCN. Blue intensity represents plasmid cost, and black line indicates results using the pBGT parameters. B) Minimal period required to avoid plasmid extinction. Simulations were performed using the pBGT measured cost ( $\kappa = 0.014$ ). Red intensity represents different values of  $\alpha$ . Note that higher values of  $\alpha$  increase the minimal period. C) Time required for trajectories to stabilize for copy numbers 5, 19, and 30 using  $\alpha = 0.99$  and the measured cost per plasmid. Note that there is a critical period that defines fixation or coexistence marked by red and blue circles on the PCN=19 (black) curve. D) Trajectories for the critical periods of PCN=19 starting from 0.5 PB-PF frequency. Note that one day period difference leads to opposite outcomes.

## 1 **Optimal PCN depends on the rate of environmental fluctuation**

2 In this section, we aim at exploring concept of optimal PCN and how it depends on the environment. To  
3 do so, we define the optimal PCN (hereafter denoted PCN\*), as the PCN that maximizes the area under  
4 the curve (AUC) of the PB frequency over time. This notion of stability was already introduced in [Figure](#)  
5 [1D](#) and has the advantage that it can be used when the PB fraction goes to 0, to a fixed equilibrium or  
6 when it oscillates.

7 First, we used an antibiotic-free regime to calculate PCN\* for a range of plasmids fitness costs (black  
8 solid line of [Figure 5A](#)). We found that PCN\* is inversely correlated with the plasmid fitness cost in an  
9 exponential manner. We compared the optimal PCN to values of PCN found in nature. Although it is not  
10 common to find studies that measure both PCN and fitness cost, we found a few of them (summarized in  
11 [Table 4](#)). These values marked as black dots in [Figure 5A](#), while the red dots represent the pBGT plasmid  
12 used in our experiments. Notably, the values of PCN found in the literature were below our predicted  
13 PCN\* in an antibiotic-free regime. However they are within the blue-shaded area that represents the  
14 PCN\* for a range of antibiotic concentrations applied daily (observe the non-linear relationship between  
15  $\alpha$ , PCN\* and cost, in line with our previous findings).

16 These observations would be consistent with a constant use of antibiotics at low doses that reduces  
17 the optimal PCN. However, similar PCN\* values can be achieved by administering higher doses of  
18 antibiotics periodically, as illustrated in [Figure 5B](#) for the case of pBGT. Notice again the non-linear  
19 relationship between PCN\* and the frequency of antibiotic exposure. At very low frequencies, the PB  
20 population goes extinct before the first antibiotic pulse and intermediate PCNs maximize the AUC as  
21 in [Figure 1D](#). At high antibiotic frequencies, the PB population persists and oscillates around some  
22 value that increases with PCN. This is consistent with a previous experimental study that evaluated the  
23 stability of costly plasmid in terms of the frequency of positive selection (Stevenson *et al.* 2018).

24 Periodic environments gave us insights on how selection acts on PCN, with results that can be used  
25 to design rational treatments that suppress plasmid-mediated antibiotic resistance (Herencias *et al.*  
26 2021). But natural environments are not periodic but highly variable, with alternating intervals of  
27 positive and negative selection. To explore this, we created stochastic environments that randomly  
28 switch from antibiotic-free to a lethal dose of antibiotic for a period of 1000 days. In our model, each  
29 random environment can be represented by a sequence of 1s and 0s, corresponding to days with and  
30 without antibiotic, respectively. Therefore stochastic environments can be characterized by its Shannon's  
31 entropy (environmental entropy, H) and the fraction of antibiotic days (namely antibiotic rate, AR) (see  
32 [Appendix B](#)). Environments were classified into "High" and "Low" depending on whether the AR was  
33 greater or lower than 0.5. Mind that each value of H corresponds to two AR values  $R$  and  $1 - R$  (see  
34 [Supplementary Figure 1](#)).

35 The panels on [Figures 5D-E](#) show the PCN\* found by applying the stochastic environments ordered by  
36 entropy or by AR, for different values of  $\alpha$ . For low values of  $\alpha$ , only high antibiotic rates lead to plasmid  
37 persistence. Notice the non-linear relationship between PCN\* and AR, similar to the one observed  
38 for the period in the deterministic setting: PCN\* decreases with AR at low values (corresponding to



extinction) but increases with AR at high values, corresponding to persistence. For higher values of  $\alpha$ , we observe that high AR always leads to persistence, while low AR can lead to extinction if entropy is low. In fact, these low values of the entropy correspond to long periods without antibiotic, in which the PB population goes to extinction. Another interesting remark is that the distribution of obtained PCN\*s is clearly multi-modal: at fixed entropy, plasmid persistence is achieved by high values of AR that correspond to high PCN\* , or by low values of AR that correspond to a small value of PCN\*. Similarly, a fixed value of  $\alpha$  corresponds to two values of PCN\* depending on the antibiotic rate (Figure 5C).

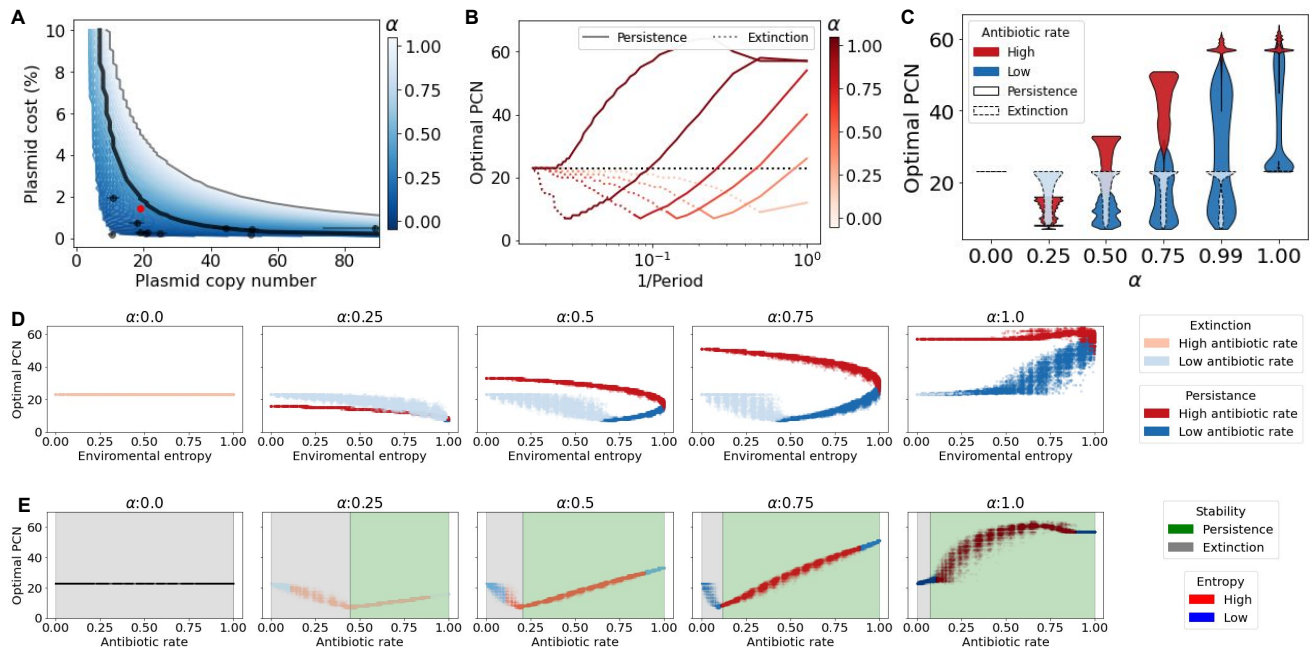

**Figure 5 Optimal PCNs in fluctuating environments.** **A)** Optimal PCN as the number of copies that maximizes the area under the curve of Figure 1B, the optimal PCN decreases exponentially as we increase the fitness cost associated with carrying plasmids, as indicated in black-solid line. Black dots show some PCN-costs data obtained from the literature. Red dots indicate the values of pBGT. Blue-scale lines indicate optimal PCN curves for many values of  $\alpha$ . Light-blues indicate higher values of  $\alpha$  whereas dark-blues indicate lower values of  $\alpha$ . Gray line shows the max PCN for the corresponding plasmid cost. **B)** Optimal PCN in periodic environments. Each curve corresponds to a value of  $\alpha$ . Black line shows  $\alpha = 0$ . Observe that for very short periods optimal PCNs are high, then for certain period the optimal PCN reaches a minimum then as period increases, the optimal PCN tends to the optimal of  $\alpha = 0$ . **C-E)** Optimal PCNs using random environments. **C)** Environments are classified by their rate of days with antibiotics, the rate differences produce a multi-modal outcome, where higher rates increases the optimal PCN and vice-versa. Simulations using the same environments were made for different  $\alpha$ s. Note that  $\alpha$  intensity increases the separation of the modes. Modes are also classified by their stability, persistence marked with a solid border line and extinction with a dashed border line. **D)** Panel of optimal PCNs plotted by the environment entropy for sample  $\alpha$ . Environments are classified by their antibiotic rate. **E)** Panel of optimal PCNs plotted by the environment antibiotic rate for sample  $\alpha$ . Environments are classified by their entropy.

## 1 Discussion

2 In this work, we have used a population genetics model to study how non-transmissible plasmids  
3 are maintained in a bacterial population. In particular, we consider small multi-copy plasmids that  
4 lack active partitioning mechanisms. The model has the following biological implications: 1) Plasmids  
5 encode for accessory genes that confer an advantage in harsh environments, for instance antibiotic  
6 resistance genes; 2) Bearing plasmids represents a fitness cost associated to plasmid replication and  
7 maintenance; 3) Each plasmid is segregated randomly to a daughter cell upon division; thus, plasmid  
8 bearing bacteria can produce plasmid-free cells with a probability of  $1/2^n$ , where  $n$  is the plasmid copy  
9 number.

10 We validated our model using a well characterized model plasmid, pBGT (San Millan *et al.* 2016;  
11 Rodriguez-Beltran *et al.* 2018; Hernandez-Beltran *et al.* 2020). By analyzing growth kinetics of the  
12 plasmid-bearing and the plasmid-free strains we estimated the maximal growth rates of both strains, as  
13 well as the fitness cost associated to plasmid bearing and the fitness advantage of the plasmid bearing  
14 cells for different antibiotic concentrations. By numerically solving our model with parameters obtained  
15 from the experimental data, we found that selection is necessary for persistence of costly plasmids.  
16 In other words, both our model and data suggest that plasmid-bearing strains found in nature have  
17 necessarily been exposed to antibiotics (or other form of positive selection) in the past.

18 By studying the dynamics under different antibiotics concentrations, we found that the strength of  
19 selection is highly correlated with the final fraction of plasmids in the entire population. Consequently,  
20 we also found that there is a trade-off between selection strength and plasmid cost, i.e. the cost per  
21 plasmid and the plasmid copy number. Whether plasmids are maintained or lost in the long term  
22 results from the complex interplay between plasmid copy number and its fitness cost, as well as the  
23 intensity, and frequency of positive selection. These relationships are not necessarily linear, as seen in  
24 the exhaustive exploration a wide-range of parameters combinations performed in this study. We argue  
25 that this model could be easily applied to make informed decisions for a specific plasmid maintenance,  
26 for instance for biotechnological purposes or to design rational sequential treatments that control  
27 plasmid-borne antibiotic resistance in clinical settings.

28 When we considered random environments, we observed that the optimal PCN depends on the  
29 strength of selection, the frequency at which antibiotics are administered (antibiotic rate) and environ-  
30 mental entropy, in a non-linear manner. In particular, we observed that fixed values of the strength of  
31 selection yield to a multi-modal distribution of the optimal PCN, depending the antibiotic rate in the  
32 environment (Figure 5C). Multi-modality of plasmid size distribution had previously been described  
33 in Smillie *et al.* (2010) for non-transmissible plasmids and in Ledda and Ferretti (2014) for conjugative  
34 plasmids. We obtained data from the literature (Zhong *et al.* 2011; Smith and Bidochka 1998; San Millan  
35 *et al.* 2014b, 2016) and explored the correlation between plasmid copy number and plasmid size. As  
36 expected, we obtained a negative correlation between plasmid size and copy number (Pearson cor-  
37 relation coefficient =  $-0.877$ ,  $p$ -value =  $8.3 \times 10^{-06}$ ; see Appendix B). In this direction, classic methods  
38 for plasmid copy number estimation correlate plasmid size with PCN (Friebs 2004). Additionally, it



has been observed that inserting foreign DNA of different sizes into the same plasmid, the size of the insertions correlates with a decrease in copy number (Warnes and Stephenson 1986; Smith and Bidochka 1998). This is in line with the correlation between optimal PCN and plasmid cost that we observe in our model.

In summary, we have showed that a trade-off between segregational loss and plasmids cost implies the existence of an optimal plasmid copy number, which depends on the plasmid cost, as well as the strength and mode of selection (constant, periodic or random). Therefore, at least in principle, if a plasmid-bearing bacterial population is found in natural conditions, under the assumption that the number of plasmids is close to optimal, the environmental conditions that the colony has experienced can be estimated using our model. Finally, our conclusion should hold for non-random segregation (e.g. active partitioning), as this would decrease the probability of segregational loss (which corresponds to having a smaller value of  $\mu_n$  in our model) so, as reported in (Lopez *et al.* 2021)), its optimal copy number will likely be lower than a plasmid that relies on random segregation.

## Acknowledgements

We thank A San Millan for the generous gift of the strains and for useful discussions. VMP acknowledges support of the Spanish Ministry of Science and Innovation to the EMBL partnership, the Centro de Excelencia Severo Ochoa and the CERCA Programme / Generalitat de Catalunya. VMP was also funded by the DGAPA-UNAM postdoctoral program. JCRHB was a doctoral student in Programa de Doctorado en Ciencias Biomédicas, Universidad Nacional Autónoma de México, and received fellowship 59691 from CONACYT. ASJ was supported by PAPIIT-UNAM (grant IA103820). RPM was supported by PAPIIT-UNAM (grant IN209419) and by CONACYT Ciencia Básica (grant A1-S-32164). AGC was supported by PAPIIT-UNAM (grant IN101722) and by CONACYT Ciencia Básica (grant A1-S-14615). The corresponding author was elected between the four PIs by means of a horse race where the winner horse was named Guilty Pleasure.

## Literature Cited

- Alonso, J. C. and M. E. Tolmasky, 2020 *Plasmids: biology and impact in biotechnology and discovery*. John Wiley & Sons.
- Athreya, K. B. and P. E. Ney, 2004 *Branching processes*, volume 1. Dover Publications, Inc., Mineola, NY.
- Baake, E., A. G. Casanova, S. Probst, and A. Wakolbinger, 2019 Modelling and simulating Lenski's long-term evolution experiment. *Theoretical population biology* **127**: 58–74.
- Baake, E., F. Cordero, and S. Hummel, 2018 A probabilistic view on the deterministic mutation–selection equation: dynamics, equilibria, and ancestry via individual lines of descent. *Journal of mathematical biology* **77**: 795–820.
- Baltrus, D. A., 2013 Exploring the costs of horizontal gene transfer. *Trends in ecology & evolution* **28**: 489–495.

- 1 Bergstrom, C. T., M. Lipsitch, and B. R. Levin, 2000 Natural selection, infectious transfer and the existence  
2 conditions for bacterial plasmids. *Genetics* **155**: 1505–1519.
- 3 Chen, I. and D. Dubnau, 2004 Dna uptake during bacterial transformation. *Nature Reviews Microbiology*  
4 **2**: 241–249.
- 5 Chen, J., N. Quiles-Puchalt, Y. N. Chiang, R. Bacigalupe, A. Fillol-Salom, *et al.*, 2018 Genome hypermobil-  
6 ity by lateral transduction. *Science* **362**: 207–212.
- 7 Chevin, L.-M., 2011 On measuring selection in experimental evolution. *Biology letters* **7**: 210–213.
- 8 Etheridge, A., 2011 *Some Mathematical Models from Population Genetics: École D'Été de Probabilités de*  
9 *Saint-Flour XXXIX-2009*, volume 2012. Springer Science & Business Media.
- 10 Friehs, K., 2004 Plasmid copy number and plasmid stability. *New trends and developments in biochemi-*  
11 *cal engineering* pp. 47–82.
- 12 Funnell, B. E. and G. Phillips, 2004 *Plasmid biology*, volume 672. ASM press Washington, DC.
- 13 Garoña, A., N. F. Hülter, D. Romero Picazo, and T. Dagan, 2021 Segregational drift constrains the  
14 evolutionary rate of prokaryotic plasmids. *Molecular Biology and Evolution* .
- 15 Gerrish, P. and R. Lenski, 1998 The fate of competing beneficial mutations in an asexual population.  
16 *Genetica* **102**.
- 17 González Casanova, A., N. Kurt, A. Wakolbinger, and L. Yuan, 2016 An individual-based model for  
18 the Lenski experiment, and the deceleration of the relative fitness. *Stochastic Processes and their*  
19 *Applications* **126**: 2211–2252.
- 20 Groisman, E. A. and H. Ochman, 1996 Pathogenicity islands: bacterial evolution in quantum leaps. *Cell*  
21 **87**: 791–794.
- 22 Hall, B. G., H. Acar, A. Nandipati, and M. Barlow, 2014 Growth rates made easy. *Molecular biology and*  
23 *evolution* **31**: 232–238.
- 24 Hall, J. P., A. J. Wood, E. Harrison, and M. A. Brockhurst, 2016 Source–sink plasmid transfer dynamics  
25 maintain gene mobility in soil bacterial communities. *Proceedings of the National Academy of Sciences*  
26 **113**: 8260–8265.
- 27 Harrison, E., D. Guymer, A. J. Spiers, S. Paterson, and M. A. Brockhurst, 2015 Parallel compensatory  
28 evolution stabilizes plasmids across the parasitism-mutualism continuum. *Current Biology* **25**: 2034–  
29 2039.
- 30 Harrison, E., V. Koufopanou, A. Burt, and R. Maclean, 2012 The cost of copy number in a selfish  
31 genetic element: the 2- $\mu$ m plasmid of *Saccharomyces cerevisiae*. *Journal of evolutionary biology* **25**:  
32 2348–2356.
- 33 Herencias, C., J. Rodríguez-Beltrán, R. León-Sampedro, A. Alonso-del Valle, J. Palkovičová, *et al.*, 2021  
34 Collateral sensitivity associated with antibiotic resistance plasmids. *Elife* **10**: e65130.
- 35 Hernandez-Beltran, J., J. Rodríguez-Beltrán, A. San Millán, R. Peña-Miller, and A. Fuentes-Hernández,  
36 2020 Quantifying plasmid dynamics using single-cell microfluidics and image bioinformatics. *Plasmid*  
37 p. 102517.
- 38 Ilhan, J., A. Kupczok, C. Woehle, T. Wein, N. F. Hülter, *et al.*, 2019 Segregational drift and the interplay  
39 between plasmid copy number and evolvability. *Molecular biology and evolution* **36**: 472–486.
- 40 Kumar, P., H. Maschke, K. Friehs, and K. Schügerl, 1991 Strategies for improving plasmid stability in

- genetically modified bacteria in bioreactors. *Trends in biotechnology* **9**: 279–284. 1
- Ledda, A. and L. Ferretti, 2014 A simple model for the distribution of plasmid lengths. arXiv preprint arXiv:1411.0297 . 2  
3
- Lopez, J., M. Donia, and N. Wingreen, 2021 Modeling the ecology of parasitic plasmids. *ISME J.* **15**: 2843–2852. 4  
5
- Mochizuki, A., K. Yahara, I. Kobayashi, and Y. Iwasa, 2006 Genetic addiction: selfish gene's strategy for symbiosis in the genome. *Genetics* **172**: 1309–1323. 6  
7
- Paulsson, J., 2002 Multileveled selection on plasmid replication. *Genetics* **161**: 1373–1384. 8
- Paulsson, J. and M. Ehrenberg, 1998 Trade-off between segregational stability and metabolic burden: a mathematical model of plasmid *colE1* replication control. *Journal of molecular biology* **279**: 73–88. 9  
10
- Pemberton, J. and R. Don, 1981 Bacterial plasmids of agricultural and environmental importance. *Agriculture and Environment* **6**: 23–32. 11  
12
- Petzoldt, T., 2019 *Estimate Growth Rates from Experimental Data*. R package version 0.8.1. 13
- R Core Team, 2020 *R: A Language and Environment for Statistical Computing*. R Foundation for Statistical Computing, Vienna, Austria. 14  
15
- Rodríguez-Beltrán, J., J. DelaFuente, R. León-Sampedro, R. C. MacLean, and Á. San Millán, 2021 Beyond horizontal gene transfer: the role of plasmids in bacterial evolution. *Nature Reviews Microbiology* pp. 1–13. 16  
17  
18
- Rodriguez-Beltran, J., J. C. R. Hernandez-Beltran, J. DelaFuente, J. A. Escudero, A. Fuentes-Hernandez, *et al.*, 2018 Multicopy plasmids allow bacteria to escape from fitness trade-offs during evolutionary innovation. *Nature ecology & evolution* **2**: 873. 19  
20  
21
- Rodriguez-Beltran, J., V. Sørum, M. Toll-Riera, C. de la Vega, R. Peña-Miller, *et al.*, 2019 Genetic dominance governs the evolution and spread of mobile genetic elements in bacteria. bioRxiv p. 863472. 22  
23
- Salje, J., 2010 Plasmid segregation: how to survive as an extra piece of dna. *Critical reviews in biochemistry and molecular biology* **45**: 296–317. 24  
25
- Salverda, M. L., J. A. G. De Visser, and M. Barlow, 2010 Natural evolution of *tem-1*  $\beta$ -lactamase: experimental reconstruction and clinical relevance. *FEMS microbiology reviews* **34**: 1015–1036. 26  
27
- San Millan, A., 2018 Evolution of plasmid-mediated antibiotic resistance in the clinical context. *Trends in microbiology* **26**: 978–985. 28  
29
- San Millan, A., J. A. Escudero, D. R. Gifford, D. Mazel, and R. C. MacLean, 2016 Multicopy plasmids potentiate the evolution of antibiotic resistance in bacteria. *Nature ecology & evolution* **1**: 1–8. 30  
31
- San Millan, A., K. Heilbron, and R. C. MacLean, 2014a Positive epistasis between co-infecting plasmids promotes plasmid survival in bacterial populations. *The ISME journal* **8**: 601–612. 32  
33
- San Millan, A. and R. C. Maclean, 2017 Fitness costs of plasmids: a limit to plasmid transmission. *Microbiology spectrum* **5**. 34  
35
- San Millan, A., R. Peña Miller, M. Toll-Riera, Z. Halbert, A. McLean, *et al.*, 2014b Positive selection and compensatory adaptation interact to stabilize non-transmissible plasmids. *Nature communications* **5**: 5208. 36  
37  
38
- Santer, M. and H. Uecker, 2020 Evolutionary rescue and drug resistance on multicopy plasmids. *Genetics* **215**: 847–868. 39  
40

- 1 Santos-Lopez, A., C. Bernabe-Balas, A. San Millan, R. Ortega-Huedo, A. Hoefler, *et al.*, 2017 Compensatory  
2 evolution facilitates the acquisition of multiple plasmids in bacteria. *bioRxiv* p. 187070.
- 3 Smillie, C., M. P. Garcillán-Barcia, M. V. Francia, E. P. Rocha, and F. de la Cruz, 2010 Mobility of plasmids.  
4 *Microbiol. Mol. Biol. Rev.* **74**: 434–452.
- 5 Smith, M. A. and M. J. Bidochka, 1998 Bacterial fitness and plasmid loss: the importance of culture  
6 conditions and plasmid size. *Canadian journal of microbiology* **44**: 351–355.
- 7 Stevenson, C., J. P. Hall, M. A. Brockhurst, and E. Harrison, 2018 Plasmid stability is enhanced by  
8 higher-frequency pulses of positive selection. *Proceedings of the Royal Society B: Biological Sciences*  
9 **285**: 20172497.
- 10 Stewart, F. M. and B. R. Levin, 1977 The population biology of bacterial plasmids: a priori conditions for  
11 the existence of conjugationally transmitted factors. *Genetics* **87**: 209–228.
- 12 Vogwill, T. and R. C. MacLean, 2015 The genetic basis of the fitness costs of antimicrobial resistance: a  
13 meta-analysis approach. *Evolutionary applications* **8**: 284–295.
- 14 Warnes, A. and J. R. Stephenson, 1986 The insertion of large pieces of foreign genetic material reduces  
15 the stability of bacterial plasmids. *Plasmid* **16**: 116–123.
- 16 Yurtsev, E. A., H. X. Chao, M. S. Datta, T. Artemova, and J. Gore, 2013 Bacterial cheating drives the  
17 population dynamics of cooperative antibiotic resistance plasmids. *Molecular systems biology* **9**: 683.
- 18 Zhong, C., D. Peng, W. Ye, L. Chai, J. Qi, *et al.*, 2011 Determination of plasmid copy number reveals  
19 the total plasmid dna amount is greater than the chromosomal dna amount in *Bacillus thuringiensis*  
20 *ybt-1520*. *PloS one* **6**: e16025.

## Appendix A: Mathematical model

### Fixed points of equation (2)

Let  $\bar{f} = f \circ g$ . We want to study the fixed points of  $\bar{f}$  and their domains of attraction. It is not hard to see that 0 is always a stable fixed point. In addition, if  $x \neq 0$ ,

$$\begin{aligned}\bar{f}(x) &= \frac{x(1-\kappa_n)(1-\mu_n)/(\alpha-\kappa_n)}{(1-\alpha)/(\alpha-\kappa_n)+x} = x \\ \Leftrightarrow x^2 + \frac{1-\alpha}{\alpha-\kappa_n}x &= \frac{(1-\kappa_n)(1-\mu_n)}{\alpha-\kappa_n}x \\ \Leftrightarrow x &= \frac{(1-\kappa_n)(1-\mu_n) - (1-\alpha)}{\alpha-\kappa_n} = 1 - \mu_n \frac{1-\kappa_n}{\alpha-\kappa_n}.\end{aligned}$$

Denote  $x^* := 1 - \mu_n(1 - \kappa_n)/(\alpha - \kappa_n)$ . Since the frequencies are in  $[0, 1]$ , this fixed point only exists if  $\alpha > \kappa_n + \mu_n(1 - \kappa_n)$ . As  $n$  increases,  $\mu_n$  decreases exponentially, while  $\kappa_n$  increases only linearly, so there is a non linear relationship between  $n$  and the minimum  $\alpha$  required for the existence of a second fixed point  $x^*$ .

Let us analyze the stability of  $x^*$ . Let us assume that  $\alpha > \kappa_n + \mu_n(1 - \kappa_n)$ .

$$\begin{aligned}\bar{f}(x) - x &= \frac{x(1-\kappa_n)(1-\mu_n)/(\alpha-\kappa_n) - x(1-\alpha)/(\alpha-\kappa_n) - x^2}{(1-\alpha)/(\alpha-\kappa_n)+x} > 0 \\ \Leftrightarrow \frac{(1-\kappa_n)(1-\mu_n)}{(\alpha-\kappa_n)} - \frac{1-\alpha}{\alpha-\kappa_n} - x &> 0 \\ \Leftrightarrow x < x^*.\end{aligned}$$

So, the frequency increases if it is below  $x^*$  and decreases otherwise, meaning that it is a stable fixed point. In addition, the domain of attraction is  $(0, 1]$ , meaning that this equilibrium fraction is reached for any initial state.

To sum up, if  $\alpha < \kappa_n + \mu_n(1 - \kappa_n)$  there is only one fixed point, 0, which is stable. If  $\alpha > \kappa_n + \mu_n(1 - \kappa_n)$  then there are two stable fixed points, 0 and  $x^*$ .

### Choice of the model

In this section, we compare two types of mathematical models for the evolution of plasmid-bearing frequencies, the discrete time model used in this paper and the Wright-Fisher diffusion.

Let us assume that the mutation rate  $\mu_{N,n} = 2^{-n}$  and the cost  $\kappa_{N,n}$  are parametrized by  $N$ . To see the accumulated effects of plasmid cost, segregational loss and genetic drift, we need  $\kappa_{N,n}$  and  $\mu_{N,n}$  to be of order  $1/N$  (see e.g. Chapter 5 in Etheridge (2011)). The first condition is fulfilled if the cost per plasmid is very low, for example when  $\kappa_{N,n} = \kappa n/N$ . The second one stands if  $n$  is of order  $\log_2(N)$ , which is the case, for example, if  $n = 20$  and  $N = 10^6$ , or if  $n = 15$  and  $N = 10^5$ . In that case we set  $\mu = N2^{-n}$ . Under this setting, when time is accelerated by  $N$ , the frequency process of individuals with plasmids

can be approximated by the solution of the stochastic differential equation (SDE)

$$dX_t = -\mu X_t dt - \kappa X_t(1 - X_t)dt + \sqrt{X_t(1 - X_t)}dB_t, \quad (4)$$

where  $B$  is a standard Brownian motion. This is known as the Wright-Fisher diffusion with mutation and selection. When antibiotic is added, at times  $\{T, 2T, \dots\}$ , then (4) modifies to

$$dX_t = \sum_{j \geq 1} \frac{\alpha X_{jT-}(1 - X_{jT-})}{1 - \alpha(1 - X_{jT-})} \mathbf{1}_{jT \leq t} - \mu X_t dt - \kappa X_t(1 - X_t)dt + \sqrt{X_t(1 - X_t)}dB_t. \quad (5)$$

1 However, in our experimental setting, the cost that we measure ( $\kappa_n \simeq 0.27$ ) is much higher than the  
 2 inverse population size, so we are in the regime of strong selection. In other words, for plasmids that  
 3 have a very small cost, of the order of  $1/N$ , genetic drift would play an important role, and the above  
 4 Wright-Fisher diffusion with mutation, selection and antibiotic peaks (5) would be the most suitable  
 5 model. But in our setting, selection (plasmid cost) is so high that genetic drift becomes negligible. Recall  
 6 that equation (2) does not need any time rescaling, whereas, in the diffusion (5) time is measured in  
 7 units of  $N$  generations. Under strong selection, the frequencies evolve much faster.

#### 8 **From the Wright-Fisher model to the serial dilution protocol**

9 In this section we provide some details on how to parametrize our model (equation (2)) to adapt to our  
 10 experimental setting.

11 *Intraday dynamics.* Day  $i$  starts with  $N$  founder individuals ( $N \sim 10^5$  in the experiment) and repro-  
 12 duction stops when saturation is reached, which corresponds to a population size of  $\gamma N$  ( $\gamma N \sim 10^7$  in  
 13 the experiment). Among the founder individuals, there is a fraction  $x$  of plasmid-free cells. We assume  
 14 that, in the absence of antibiotic, the population evolves as a continuous time multi-type branching  
 15 process  $\mathbf{Z}_t = (Z_t^0, Z_t^1)$  where the reproduction rate (or *Malthusian fitness*) of PB (resp. PF) individuals  
 16 is  $r$  (resp.  $r + \rho$ ), with  $\rho > 0$  (since PB individuals have some disadvantage due to the cost of plasmid  
 17 maintenance).

Following González Casanova *et al.* (2016), we assume that  $\rho \sim N^{-b}$  for some  $b \in (0, 1/2)$  (this regime is known as *moderate-strong selection*). In every branching event, an individual splits in two. Plasmid-free individuals only split in two PF individuals. Plasmid-bearing individuals can split in one PF individual and one PB individual with probability  $2^{-n}$  (if all the plasmids go to one of them) or they can split in two plasmid-bearing individuals with probability  $1 - 2^{-n}$ . Let  $M(t) = \{M_{i,j}(t) : i, j = 0, 1\}$  be the mean matrix given by  $M_{i,j}(t) = \mathbb{E}_{\mathbf{e}_i}(Z_t^j)$ , the average size of the type  $j$  population at time  $t$  if we start with a type  $i$  individual. According to (Athreya and Ney 2004, Section V.7.2),  $M(t)$  can be calculated as an exponential matrix

$$M(t) = e^{tA} \quad \text{where} \quad A = \begin{pmatrix} r + \rho & 0 \\ r2^{-n} & r(1 - 2^{-n}) \end{pmatrix}.$$



More precisely,

$$M(t) = \begin{pmatrix} e^{(r+\rho)t} & 0 \\ \frac{r2^{-n}}{r2^{-n}+\rho}(e^{(r+\rho)t} - e^{r(1-2^{-n})t}) & e^{r(1-2^{-n})t} \end{pmatrix}.$$

Let  $\sigma$  be the duration of the growth phase. Since  $N$  is very large, one can assume that reproduction is stopped when the expectation of the number of descendants reaches  $\gamma N$ , i.e. that  $\sigma$  satisfies

$$\begin{aligned} \gamma N &= (1-x)N(M_{0,0}(\sigma) + M_{0,1}(\sigma)) + xN(M_{1,0}(\sigma) + M_{1,1}(\sigma)) \\ &= Ne^{r\sigma} \left( e^{\rho\sigma} + \rho x \frac{e^{-r2^{-n}\sigma} - e^{\rho\sigma}}{r2^{-n} + \rho} \right). \end{aligned}$$

Since  $\rho \sim N^{-b}$ , we have for large enough  $N$  that

$$\sigma \simeq \frac{\log \gamma}{r}.$$

*Interday dynamics.* We consider a discrete time model, with fixed population size  $N$ , in which generation  $i$  corresponds to the founder individuals of day  $i$ . Suppose that the frequency of plasmid-bearing individuals in generation  $i$  is  $x$ . To form generation  $i+1$  we sample  $N$  individuals from the  $\gamma N$  individuals present at the end of day  $i$ . Since  $\gamma$  is large enough, we can assume that individuals are sampled with replacement. The probability that an individual in the sample is PB is equal to

$$\frac{xM_{1,1}(\sigma)}{(1-x)(M_{0,0}(\sigma) + M_{0,1}(\sigma)) + x(M_{1,0}(\sigma) + M_{1,1}(\sigma))} = \frac{xe^{-(r2^{-n}+\rho)\sigma}}{(1-x) + x \frac{r2^{-n} + \rho e^{-(r2^{-n}+\rho)\sigma}}{r2^{-n} + \rho}}. \quad (6)$$

This is equal to the probability of choosing a PB parent in the Wright-Fisher model introduced above, with

$$\kappa_n = \frac{\rho(1 - e^{-(r2^{-n}+\rho)\sigma})}{r2^{-n} + \rho} \quad \text{and} \quad \mu_n = 1 - \frac{r2^{-n} + \rho}{r2^{-n} e^{(r2^{-n}+\rho)\sigma} + \rho}. \quad (7)$$

## Appendix B: Methods

### Bacterial strains and media

The plasmid free strain we used was *E. coli* K12 MG1655 and the plasmid bearing strain was MG/pBGT (San Millan *et al.* 2016) carrying the multi-copy plasmid pBGT with the  $\beta$ -lactamase *bla*<sub>TEM-1</sub> which confers resistance to ampicillin and the fluorescent protein GFP under an arabinose inducible promoter.

Overnight cultures were grown in flasks with 20 ml of lysogeny broth (LB) (Sigma L3022) with 0.5 % w/v L-(+)-Arabinose (Sigma A91906) for fluorescence induction, in a shaker-incubator at 220 RPM at 37 °C. For the plasmid bearing strain, 25 mg/l of ampicillin (Sigma A0166) were added to eliminate segregants. Ampicillin stock solutions were prepared at 100 mg/ml directly in LB and sterilized by 0.22  $\mu$ m (Millex-GS SLGS033SB) filtering. Arabinose stock solutions were prepared at 20% w/v in DD water

1 and sterilized by filtration.

2 To construct our inoculation plate, overnight cultures of the plasmid-free strain and the plasmid  
3 bearing strain were adjusted to 1 OD (630 nm) using a BioTek ELx808 Absorbance Microplate Reader  
4 diluted with fresh ice cooled LB. Appropriate volumes were mixed to make co-cultures at fractions 0,  
5 0.1, 0.2, ..., 1 and set column-wise on a 96-well plate (Corning CLS3370).

6 Competition experiments were performed using 96-well plates with 200  $\mu$ l of LB with 0.5% w/v  
7 arabinose, and respective ampicillin concentrations: 0, 1, 2, 2.5, 3, 3.5, 4, and 6 mg/l was implemented by  
8 plate rows. Antibiotic plates were inoculated using a 96 Pin microplate replicator (Boeckel 140500), flame  
9 sterilization was made before each inoculation. Four replicates plates were grown in static incubator at  
10 37°C. After 24 hours growth, plates were read in a fluorescence microplate reader (BioTek Synergy H1)  
11 using OD (630 nm) and eGFP (479,520 nm) after 1 minute shaking.

12 Growth kinetics measurements were performed in 96 well plates with 200  $\mu$ l of LB with 0.5% w/v  
13 arabinose without antibiotics, plates were sealed using X-Pierce film (Sigma Z722529), each well seal film  
14 was pierced in the middle with a sterile needle to avoid condensation. Plates were grown at 37 deg C  
15 and reading for OD and fluorescence were made every 20 minutes after 30 seconds linear shaking.

## 16 **Plasmid fraction determination**

17 To calculate fluorescence intensity values, we first subtracted the background signal of LB for fluores-  
18 cence and OD respectively, then the debackgrounded fluorescence signal was scaled dividing by the  
19 debackgrounded OD. The measurements for our inoculation plate showed a strong linear correlation  
20 ( $R^2 = 0.995$ ) between co-cultures fractions and fluorescence intensity (Figure 3A). This allowed to directly  
21 approximate the populations plasmid fractions from the readings of our competition experiments. We  
22 normalized the data independently for each antibiotic concentration taking the average measurements  
23 of the 4 replicates. Plasmid fractions,  $PF$ , were inferred by normalizing the mean fluorescence intensity  
24 for each well,  $f_i$ , to the interval [0,1] using the following formula:  $PF_i = (f_i - f_{min}) / (f_{max} - f_{min})$  were  
25  $f_{max}$  and  $f_{min}$  are the mean fluorescence intensities at fractions 1 and 0 respectively.

## 26 **Parameters estimation**

27 Model kinetics parameters were estimated using the R (R Core Team 2020) package growth rates  
28 (Petzoldt 2019). Exponential phase duration,  $\sigma$ , was calculated by finding lag phase duration using the  
29 linear model and the time to reach carrying capacity, found using the non-linear growth model Baranyi.  
30 Maximum growth rates,  $r$  and  $r + \rho$ , were estimated using the smooth spline method.  $\kappa_n$  value was  
31 estimated using equation (1) and the data from the antibiotic-free competition experiment using a curve  
32 fitting algorithm from the SciPy library in a custom Python script. Respective values of  $\alpha$  were found in  
33 the same manner using equation (2) and fixing  $\kappa_n$ .  $\kappa_n$  was also calculated using the formula in equation  
34 3 with a very similar result. The parameters are summarized in Tables 1 and 2.

## Random environments

Environmental sequences of size 1000 (days) using a binomial distribution varying the probability of success. For each environment created we also bit-flipped (so 101... turns into 010...) and two measures was applied to each resulting environments. First, we used Shannon entropy,  $H(Env) = -\sum_i^n p_i \log_n(p_i)$ , with two states,  $n = 2$  (antibiotic or no-antibiotic) and  $p_i$  equal to the probability of finding an state day, i.e. the fractions of days with antibiotics and without antibiotics. We classified environments by their  $H$  and by the fraction of antibiotic days, as being this an important feature. This two measures are in the [0,1] interval so we binned the intervals into 20 bins and 1,000 environments were created for each bin.

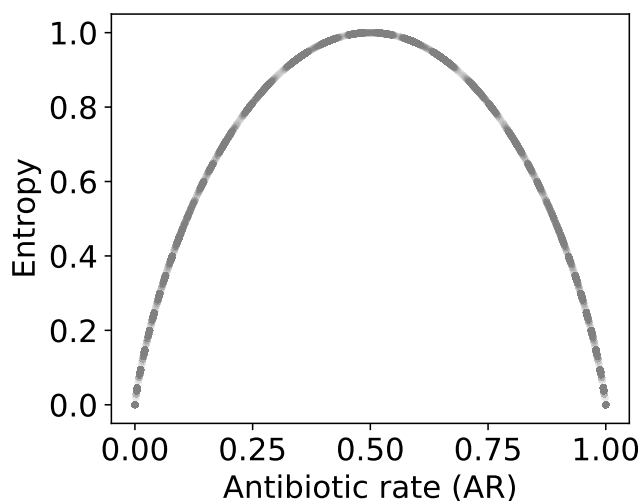

**Sup. Figure 1** Relationship between random environments antibiotic rate and Entropy.

## Simulations details

The model was implemented in Python, using standard scientific computing libraries (Numpy, Matplotlib, and the Decimal library was required to resolve small numbers conflicts). In general, all simulations started at PB frequency 1, with the exceptions of figure 2 and 4D. Numeric simulations were defined to reach a steady state the first time a value is repeated. In the case of periodic environments, the repetition must happen at antibiotics peaks days. We considered extinction if the end point of the realization dropped below a threshold adjusted to the simulations times, the highest being  $1 \times 10^{-7}$  and the lowest  $1 \times 10^{-100}$ .

## Plasmid size and copy number association

We searched the literature for articles where both plasmid copy number and plasmid size had been measured. We found a strong negative correlation between the logarithms of these two quantities (Pearson correlation coefficient of -0.877, [Sup. Figure 2](#)). Data is summarized in [Table 4](#).

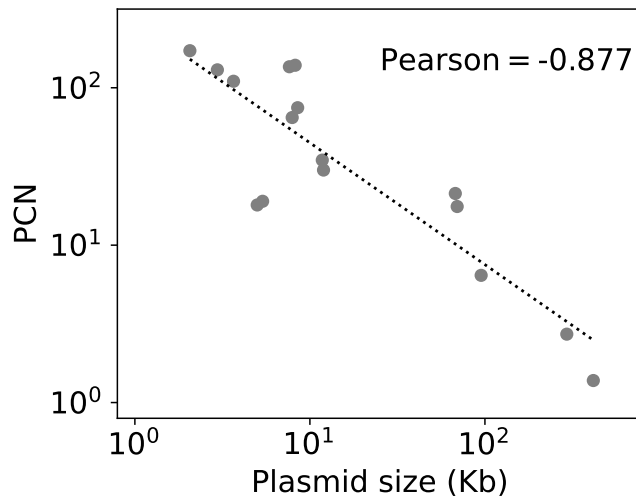

**Sup. Figure 2** Plasmid size and plasmid copy number (log-log scale). Data from references in Table 4.

## 1 Tables

| Parameter  | Measured value | Formula                                                                       | Estimated value | Description                  |
|------------|----------------|-------------------------------------------------------------------------------|-----------------|------------------------------|
| $r$        | 0.435435       | NA                                                                            | NA              | plasmid strain growth rate   |
| $\rho$     | 0.052334       | NA                                                                            | NA              | WT growth rate advantage     |
| $\sigma$   | 6.074089       | NA                                                                            | NA              | exponential phase duration   |
| $\mu_n$    | NA             | $\mu_n = 1 - \frac{r2^{-n} + \rho}{r2^{-n}e^{(r2^{-n} + \rho)\sigma} + \rho}$ | 5.938e-06       | 1-day fraction of segregants |
| $\kappa_n$ | NA             | $\kappa_n = \frac{\rho(1 - e^{-(r2^{-n} + \rho)\sigma})}{r2^{-n} + \rho}$     | 0.272313        | fitness cost                 |
| $n$        | 19             | NA                                                                            | NA              | plasmid copy number          |

**Table 1** Model kinetic parameters

| Amp | $\kappa_n$ | $\alpha$  |
|-----|------------|-----------|
| 0.0 | 0.272276   | 0.0       |
| 1.0 | 0.272276   | -0.37781  |
| 2.0 | 0.272276   | -0.332662 |
| 2.5 | 0.272276   | -0.058457 |
| 3.0 | 0.272276   | 0.992911  |
| 3.5 | 0.272276   | 0.9801    |
| 4.0 | 0.272276   | 0.992075  |
| 6.0 | 0.272276   | 0.99373   |

**Table 2** Selection parameters

| Name            | Plasmid Type | Species                              | PCN     | PCN SD | Cost   | Cost SD | Reference                         |
|-----------------|--------------|--------------------------------------|---------|--------|--------|---------|-----------------------------------|
| pB1006          | ColE1        | <i>Haemophilus influenzae</i> RdKW20 | 10.530  | 1.112  | 0.021  | 0.012   | Santos-Lopez <i>et al.</i> (2017) |
| pB1005          | ColE1        | <i>Haemophilus influenzae</i> RdKW20 | 20.450  | 2.590  | 0.05   | 0.013   | Santos-Lopez <i>et al.</i> (2017) |
| pB1000          | ColE1        | <i>Haemophilus influenzae</i> RdKW20 | 25.020  | 1.920  | 0.054  | 0.002   | Santos-Lopez <i>et al.</i> (2017) |
| pNI105          |              | <i>Pseudomonas aeruginosa</i>        | 18.000  | 2.400  | 0.132  | 0.025   | San Millan <i>et al.</i> (2014a)  |
| 2-uM            |              | <i>Saccharomyces cerevisiae</i>      | 52.000  | 0.000  | 0.0884 | 0.00416 | Harrison <i>et al.</i> (2012)     |
| pNUK73          |              | <i>Pseudomonas aeruginosa</i>        | 11.030  | 1.890  | 0.214  | 0.008   | San Millan <i>et al.</i> (2014a)  |
| pBGT            | ColE1        | <i>Escherichia coli</i>              | 19.120  | 1.560  | 0.057  | 0.013   | San Millan <i>et al.</i> (2016)   |
| pBGT R164S      | ColE1        | <i>Escherichia coli</i>              | 21.100  | 0.850  | 0.057  | 0.003   | San Millan <i>et al.</i> (2016)   |
| pBGT G54U       | ColE1        | <i>Escherichia coli</i>              | 44.500  | 3.810  | 0.207  | 0.019   | San Millan <i>et al.</i> (2016)   |
| pBGT G55U       | ColE1        | <i>Escherichia coli</i>              | 88.930  | 15.650 | 0.443  | 0.116   | San Millan <i>et al.</i> (2016)   |
| pBGT R164S G54U | ColE1        | <i>Escherichia coli</i>              | 52.300  | 2.190  | 0.238  | 0.016   | San Millan <i>et al.</i> (2016)   |
| pBGT R164S G55U | ColE1        | <i>Escherichia coli</i>              | 127.290 | 4.580  | 0.491  | 0.082   | San Millan <i>et al.</i> (2016)   |

**Table 3** Plasmid copy number and plasmid costs from literature. SD Standard Deviation.

| Name             | Plasmid Type              | Species                   | PCN Mean | PCN SD | Size (Kb) | Reference                        |
|------------------|---------------------------|---------------------------|----------|--------|-----------|----------------------------------|
| pBMB2062         | RCR                       | <i>B. thuringiensis</i>   | 172      | 5.67   | 2.062     | Zhong <i>et al.</i> (2011)       |
| pBMB7635         | RCR                       | <i>B. thuringiensis</i>   | 136      | 6.36   | 7.635     | Zhong <i>et al.</i> (2011)       |
| pBMB7921         | RCR                       | <i>B. thuringiensis</i>   | 64.7     | 1.12   | 7.921     | Zhong <i>et al.</i> (2011)       |
| pBMB8240         | ?                         | <i>B. thuringiensis</i>   | 139      | 1.76   | 8.24      | Zhong <i>et al.</i> (2011)       |
| pBMB8513         | RCR                       | <i>B. thuringiensis</i>   | 74.7     | 1.44   | 8.513     | Zhong <i>et al.</i> (2011)       |
| pBMB11           | RCR                       | <i>B. thuringiensis</i>   | 34.7     | 0.69   | 11.769    | Zhong <i>et al.</i> (2011)       |
| pBMB67           | $\theta$                  | <i>B. thuringiensis</i>   | 21.3     | 1.06   | 67.73     | Zhong <i>et al.</i> (2011)       |
| pBMB69           | $\theta$                  | <i>B. thuringiensis</i>   | 17.6     | 0.7    | 69.416    | Zhong <i>et al.</i> (2011)       |
| pBMB95           | $\theta$                  | <i>B. thuringiensis</i>   | 6.43     | 0.09   | 95.15     | Zhong <i>et al.</i> (2011)       |
| pBMB293          | ?                         | <i>B. thuringiensis</i>   | 2.72     | 0.16   | 293.574   | Zhong <i>et al.</i> (2011)       |
| pBMB400          | ?                         | <i>B. thuringiensis</i>   | 1.38     | 0.14   | 416.21    | Zhong <i>et al.</i> (2011)       |
| pBluescript      | ColE1 (derivative) and F1 | <i>E. coli</i> XL1Blue    | 130      | 0      | 2.961     | Smith and Bidochka (1998)        |
| pBluescript+700  | ColE1 (derivative) and F2 | <i>E. coli</i> XL1Blue    | 110      | 0      | 3.661     | Smith and Bidochka (1998)        |
| pBluescript+9000 | ColE1 (derivative) and F3 | <i>E. coli</i> XL1Blue    | 30       | 0      | 11.961    | Smith and Bidochka (1998)        |
| pNI105           | pSC101?                   | <i>P. aeruginosa</i> PAO1 | 18       | 2.4    | 4.95      | San Millan <i>et al.</i> (2014a) |
| pBGT             | ColE1                     | <i>E. coli</i>            | 19       | 1.56   | 5.369     | San Millan <i>et al.</i> (2016)  |

**Table 4** Plasmid copy number and plasmid size from literature. SD Standard Deviation. RCR Rolling Circle Replication.
